# Supplementary material for: On the electronic structure of the hydrogenase H-cluster
Source: Royal Society of Chemistry journal article supplement (doi:10.1039/b604994j), 2006-01-01
Supplement: b604994j.pdf [file b604994j.pdf]

Supporting Information for

## Delocalized Electronic Structure of Hydrogenase H-cluster

David E. Schwab<sup>a</sup>, Cedric Tard<sup>b</sup>, Eric Brecht<sup>a</sup>, John W. Peters<sup>a</sup>, Christopher J. Pickett<sup>b,c</sup>, Robert K. Szilagyí<sup>a</sup>

<sup>a</sup> Department of Chemistry and Biochemistry, Montana State University, Bozeman, MT, 59718

<sup>b</sup> Department of Chemical Biology, John Innes Research Center, Norwich, U.K.

<sup>c</sup> School of Chemical Sciences and Pharmacy, University of East Anglia, Norwich, UK NR4 7TJ

Pages 2-3: Details of XAS data collection

Pages 4-8: Details of DFT calculations and coordinates of initial and optimized structures

Optimized Atomic Coordinates of  $^1[(\text{LS}_3)\text{Fe}_4\text{S}_4\{\text{Fe}_2(\text{CH}_3\text{C}(\mu\text{-SCH}_2)_3(\text{CO})_5\}]^{2-}$

Optimized Structure of  $^1[(\text{LS}_3)\text{Fe}_4\text{S}_4\{\text{Fe}_2(\text{CH}_3\text{C}(\mu\text{-SCH}_2)_3(\text{CO})_5\}]^{2-}$  with selected internal coordinates

Figure S1: Frontier molecular orbitals for the biomimetic H-cluster compound

(orbital plots were generated in GOpenMol: <http://www.csc.fi/gopenmol/>)

Figure S2: S K-edge spectra of the wild-type native and CO-bound resting forms of *CpI* hydrogenase

Figure S3: Difference plot (yellow/green at  $\pm 0.003$  contour levels) between the electron densities of the [6Fe] and the separate [4Fe]- and [2Fe]-subclusters for the computational model of the hydrogenase active site.

Figure S4: Frontier molecular orbitals for the [6Fe] cluster model of the hydrogenase active site

### Details of XAS data collection

Model complexes  $[\text{Fe}_2\text{S}_2(\text{CO})_6]$ ,<sup>1</sup>  $[\text{Fe}_2(\text{SEt})_2(\text{CO})_6]$ ,<sup>2</sup>  $[\text{Fe}_2(1,3\text{-propanedithiolate})(\text{CO})_6]$ ,<sup>3</sup>  $[\text{Fe}_2(\text{di}(2\text{-methylthiolate)ammine})](\text{CO})_6]$ ,<sup>4</sup>  $[\text{Fe}_2(\text{CH}_3\text{C}(\text{CH}_2\text{S})_2(\text{CH}_2\text{SCH}_3)(\text{CO})_5)]$ ,<sup>5</sup>  $(\text{Bu}_4\text{N})_2[(1,3,5\text{-tris}(4,6\text{-dimethyl-3-mercaptophenylthio)-2,4,6\text{-tris}(p\text{-tolyl-thio)benzene})\text{Fe}_4\text{S}_4(\text{SEt})]$ ,<sup>6</sup> and  $(\text{Bu}_4\text{N})_2[(1,3,5\text{-tris}(4,6\text{-dimethyl-3-mercaptophenylthio)-2,4,6\text{-tris}(p\text{-tolyl-thio)benzene})\text{Fe}_4\text{S}_4\{\text{Fe}_2(\text{CH}_3\text{C}(\text{CH}_2\text{S})_3)(\text{CO})_5\}]$ <sup>6</sup> were synthesized by established protocols in CJP's laboratory. The wild-type and CO-bound native *CpI* hydrogenase samples were prepared anaerobically in JWP's laboratory in about 1 mM protein concentration. The sulphur K-edge XAS measurements were carried out at BL6-2 of Stanford Synchrotron Radiation Laboratory (beamtime proposal 2893MP). Details of beamline setup and optimization have been published elsewhere.<sup>7</sup> The solid samples were ground and pasted onto a sulphur-free Mylar tape from Shercon in a glovebox with sub ppm oxygen and moisture levels. Protein samples with 20% glycerol were kept in a Teflon cell under liquid nitrogen and directly mounted to a Cu block purged with dry nitrogen gas that was cooled in a liquid nitrogen filled cryostat. A constant  $-30 \pm 5$  °C temperature were maintained during the measurement. Samples were protected by a thin polypropylene window (Specs CertiPrep) during sample mounting and change at the beamline from exposure to air. Fluorescence signal was collected using Lytle detector positioned at 45° solid angle relative to the sample cell. The incident photon energy was scanned in 0.5 eV steps outside the rising edge region where the stepsize was 0.1 eV. At least five scans were averaged to obtain a good signal-to-noise ratio. The incident photon energy was calibrated to the first transition (2472.02 eV) of the sodium thiol sulphate pentahydrate spectrum. A smooth background (second order polynomial) was subtracted from the spectra and normalized at 2490 eV of the spline (second order polynomial). Background subtractions, and spline were performed using PeakFit 4.12 (SeaSolve). S K-edge spectra of [2Fe] complexes in the full energy range after background subtraction and spline (along the dotted line) are shown on page S2.

<sup>1</sup> D. Seyferth, R. S. Henderson and L. C. Song, *Organometallics* 1982, **1**, 125-133.

<sup>2</sup> S. Jeannin, Y. Jeannin, F. Robert and C. Rosenberger, *J. Organomet. Chem.* 1993, **448**, 151-155.

<sup>3</sup> E. J. Lyon, I. P. Georgakaki, J.H. Reibenspies and M. Y. Darensbourg, *Angew. Chem. Int. Ed.* 1999, **38**, 3178-3180.

<sup>4</sup> J. D. Lawrence, H. X. Li, T. B. Rauchfuss, M. Benard and M. M. Rohmer, *Angew. Chem. Int. Ed.* 2001, **40**, 1768-1771.

<sup>5</sup> M. Razavet, S. C. Davies, D. L. Hughes, J. E. Barclay, D. J. Evans, S. A. Fairhurst, X. Liu and C. J. Pickett *Dalton Trans.* 2003, 586-585.

<sup>6</sup> C. Tard, X. M. Liu, S. K. Ibrahim, M. Bruschi, L. De Gioia, S. C Davies, L. S. Wang, G Sawers and C. J. Pickett *Nature* 2005, **433**, 610-613.

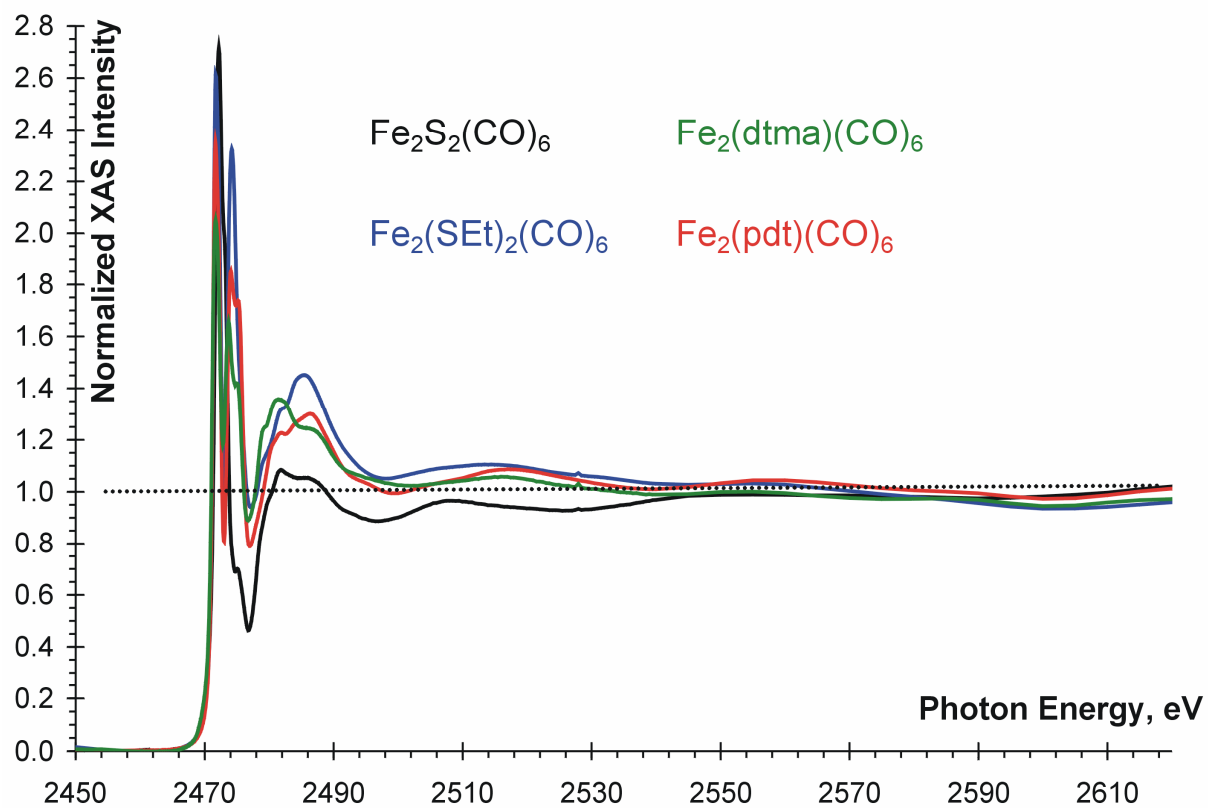

<sup>7</sup> E. I. Solomon, B. Hedman, K.O. Hodgson, A. Dey and R.K. Szilagy *Coord. Chem. Rev.* 2005, **249**, 97-129.

### Details of DFT Calculations

Density functional calculations were carried out using the Gaussian03 suite<sup>8</sup>. The electronic structures of the computational models  $^1[(LS_3)Fe_4S_4\{Fe_2(CH_3C(\mu-SCH_2)_3(CO)_5\})_2]^{2-}$ ,  $^2[(EtS)_3Fe_4S_4(\mu-SEt)Fe_2(pdt)(\mu-CO)(CN)_2(CO)_2(OH_2)]^{3-}$  and their ionic fragments were calculated employing a gradient corrected density functional composed Becke non-local and Slater local density functional exchange<sup>9</sup> and Perdew non-local and Vosko-Wilk-Nussair local density functional correlation<sup>10</sup> functions (BP). Due to the size of a sufficiently large all-electron basis set, calculations were carried out using Stuttgart-Dresden effective core potential and corresponding valence triple- $\zeta$  basis set (ECP2),<sup>11</sup> which approximates the basis set convergence limit reasonably well.<sup>12</sup> We have utilized an ionic fragment based approach<sup>12</sup> to evaluate all possible spin coupling schemes for the [6Fe] models and results obtained for only the lowest energy structures are discussed in the text. The initial structure of the H-cluster framework was generated by merging the 4Fe-cluster from  $[(LS_3)Fe_4S_4]_2(\mu-SEt)$ <sup>13</sup> and the 2Fe-cluster from  $[Fe_2(CH_3C(\mu-SCH_2)_2(CH_2SCH_3))(CO)_5]$ <sup>5</sup>. The composite structure of the H-cluster was generated by merging the active site structures for *Cp*<sup>14</sup> and *Dd*<sup>15</sup> hydrogenases to contain a bridging CO ligand, terminal water at the distal position, and a propanadithiolate ligand.

---

<sup>8</sup> M. J. Frisch, G. W. Trucks, H. B. Schlegel, G. E. Scuseria, M. A. Robb, J. R. Cheeseman, J. A. J. Montgomery, T. Vreven, K. N. Kudin, J. C. Burant, J. M. Millam, S. S. Iyengar, J. Tomasi, V. Barone, B. Mennucci, M. Cossi, G. Scalmani, N. Rega, G. A. Petersson, H. Nakatsuji, M. Hada, M. Ehara, K. Toyota, R. Fukuda, J. Hasegawa, M. Ishida, T. Nakajima, Y. Honda, O. Kitao, H. Nakai, M. Klene, X. Li, J. E. Knox, H. P. Hratchian, J. B. Cross, C. Adamo, J. Jaramillo, R. Gomperts, R. E. Stratmann, O. Yazyev, A. J. Austin, R. Cammi, C. Pomelli, J. W. Ochterski, P. Y. Ayala, K. Morokuma, G. A. Voth, P. Salvador, J. J. Dannenberg, V. G. Zakrzewski, S. Dapprich, A. D. Daniels, M. C. Strain, O. Farkas, D. K. Malick, A. D. Rabuck, K. Raghavachari, J. B. Foresman, J. V. Ortiz, Q. Cui, A. G. Baboul, S. Clifford, J. Cioslowski, B. B. Stefanov, G. Liu, A. Liashenko, P. Piskorz, I. Komaromi, R. L. Martin, D. J. Fox, T. Keith, M. A. Al-Laham, C. Y. Peng, A. Nanayakkara, M. Challacombe, P. M. W. Gill, B. Johnson, W. Chen, M. W. Wong, C. Gonzalez and J. A. Pople, Gaussian03, (2004) Gaussian, Inc., Pittsburgh PA.

<sup>9</sup> A. D. Becke *Phys. Rev. A: Gen. Phys.* 1988, **38**, 3098-3100.

<sup>10</sup> J. P. Perdew *Phys. Rev. B: Cond. Mater.* 1986, **33**, 8822-8824.

<sup>11</sup> M. Dolg, U. Wedig, H. Stoll and H. Preuss, *J. Chem. Phys.* 1987, **86**, 866-872; U. Wedig, M. Dolg, H. Stoll and H. Preuss In *Quantum Chemistry: The Challenge of Transition Metals and Coordination Chemistry*, Ed. A. Veillard, D. Reidel Publ. Co., Dordrecht: The Netherlands, 1986; **176**, pp 79-89.

<sup>12</sup> R. K. Szilagy and M. A. Winslow *J. Comput. Chem.* 2006, **27**, in press.

<sup>13</sup> P. V. Rao, S. Bhaduri, J. Jiang, D. Hong and R. H. Holm *J. Am. Chem. Soc.* 2005, **127**, 1933-1945.

<sup>14</sup> J. W. Peters, W. N. Lanzilotta, B. J. Lemon and L. C. Seefeldt *Science* 1998, **282**, 1853-1858.

<sup>15</sup> Y. Nicolet, C. Piras, P. Legrand, C. E. Hatchikian and J. C. Fontecilla-Camps *Struct. Fold Des.* 1999, **7**, 13-23.

**Optimized Atomic Coordinates of  $^1[(LS_3)Fe_4S_4\{Fe_2(CH_3C(\mu-SCH_2)_3\}(CO)_5\}]^{2-}$**

|    |           |           |           |    |                   |           |           |
|----|-----------|-----------|-----------|----|-------------------|-----------|-----------|
| S  | 15.416073 | 23.403032 | 8.367902  | C  | 12.911452         | 26.627520 | 8.293752  |
| Fe | 16.602191 | 21.656657 | 7.254397  | H  | 13.215817         | 25.581388 | 8.352844  |
| Fe | 16.817718 | 24.344944 | 6.696926  | S  | 12.150735         | 23.360785 | 5.914890  |
| Fe | 14.406141 | 23.072640 | 6.338407  | C  | 11.071948         | 23.300398 | 7.409347  |
| S  | 18.319708 | 22.652975 | 5.964837  | C  | 9.676224          | 23.379918 | 7.189625  |
| S  | 15.096582 | 20.892514 | 5.701244  | H  | 9.301458          | 23.430685 | 6.164172  |
| S  | 15.420535 | 24.669417 | 4.901640  | C  | 8.789696          | 23.414253 | 8.277404  |
| Fe | 16.451912 | 22.534115 | 4.674551  | H  | 7.712362          | 23.485520 | 8.096927  |
| S  | 17.268013 | 19.946985 | 8.628401  | C  | 9.273224          | 23.386721 | 9.597727  |
| C  | 17.665284 | 20.351414 | 10.385765 | H  | 8.589412          | 23.457127 | 10.447620 |
| C  | 18.614556 | 19.526396 | 11.031198 | C  | 10.662026         | 23.289471 | 9.805316  |
| H  | 19.130547 | 18.756060 | 10.453153 | C  | 11.564006         | 23.229439 | 8.732899  |
| C  | 18.876106 | 19.692896 | 12.401148 | H  | 12.636781         | 23.133658 | 8.911784  |
| H  | 19.615653 | 19.054156 | 12.894393 | S  | 11.193656         | 23.180335 | 11.593162 |
| C  | 18.194792 | 20.669075 | 13.148323 | C  | 12.920873         | 23.880706 | 11.649550 |
| H  | 18.392958 | 20.794282 | 14.216354 | C  | 13.950712         | 23.074354 | 12.198606 |
| C  | 17.257943 | 21.491818 | 12.492549 | S  | 13.695329         | 21.296690 | 12.737404 |
| C  | 16.995246 | 21.355371 | 11.122580 | C  | 12.886087         | 20.413715 | 11.298531 |
| H  | 16.285692 | 22.014928 | 10.620385 | C  | 13.482531         | 20.376536 | 10.028465 |
| S  | 16.400954 | 22.722991 | 13.608250 | H  | 14.385200         | 20.950020 | 9.813722  |
| C  | 15.206603 | 23.658622 | 12.528391 | C  | 12.916051         | 19.572161 | 9.021592  |
| C  | 15.453638 | 25.026590 | 12.247426 | H  | 13.381995         | 19.558258 | 8.032854  |
| S  | 16.981689 | 25.932894 | 12.835437 | C  | 11.777576         | 18.793240 | 9.293564  |
| C  | 18.444384 | 24.901220 | 12.300907 | H  | 11.346217         | 18.165529 | 8.508618  |
| C  | 19.458670 | 24.691435 | 13.255204 | C  | 11.194679         | 18.826106 | 10.575017 |
| H  | 19.303844 | 25.004173 | 14.290933 | H  | 10.301812         | 18.230913 | 10.789810 |
| C  | 20.651223 | 24.054806 | 12.866863 | C  | 11.740988         | 19.644639 | 11.580102 |
| H  | 21.439278 | 23.887815 | 13.607798 | H  | 11.274102         | 19.705902 | 12.566238 |
| C  | 20.818589 | 23.612349 | 11.540457 |    | - merging point - |           |           |
| H  | 21.739236 | 23.103047 | 11.242038 | S  | 16.645046         | 22.365689 | 2.297607  |
| C  | 19.794785 | 23.819374 | 10.599777 | C  | 14.835787         | 22.752647 | 1.725880  |
| H  | 19.906397 | 23.483450 | 9.566126  | H  | 14.384934         | 23.228500 | 2.609822  |
| C  | 18.607332 | 24.476335 | 10.973816 | H  | 14.954240         | 23.517094 | 0.939360  |
| H  | 17.835208 | 24.656915 | 10.225566 | C  | 13.903861         | 21.627980 | 1.201999  |
| S  | 18.253148 | 26.030539 | 7.350975  | C  | 12.457798         | 22.230943 | 1.257986  |
| C  | 17.473937 | 27.277601 | 8.469985  | H  | 12.152972         | 22.407709 | 2.304142  |
| C  | 18.049377 | 28.569797 | 8.486277  | H  | 12.420045         | 23.195188 | 0.720013  |
| H  | 18.857491 | 28.801505 | 7.788150  | H  | 11.730172         | 21.542625 | 0.791879  |
| C  | 17.595468 | 29.532528 | 9.402302  | C  | 13.873347         | 20.360464 | 2.073408  |
| H  | 18.052461 | 30.527158 | 9.415159  | H  | 13.765236         | 20.623178 | 3.138485  |
| C  | 16.576791 | 29.225349 | 10.321330 | H  | 13.028227         | 19.717841 | 1.774254  |
| H  | 16.249533 | 29.960783 | 11.061250 | S  | 15.399866         | 19.190545 | 2.101512  |
| C  | 15.995541 | 27.943201 | 10.283443 | C  | 14.177816         | 21.292197 | -0.272236 |
| C  | 16.418043 | 26.974553 | 9.361083  | H  | 14.057703         | 22.197868 | -0.892074 |
| H  | 15.948585 | 25.988917 | 9.334043  | H  | 13.484689         | 20.515714 | -0.633371 |
| S  | 14.620672 | 27.670892 | 11.517680 | S  | 15.946660         | 20.685002 | -0.704509 |
| C  | 14.432349 | 25.822303 | 11.657028 | Fe | 17.223755         | 20.351740 | 1.242998  |
| C  | 13.164959 | 25.253571 | 11.371769 | Fe | 16.111825         | 18.440744 | -0.025126 |
| S  | 11.690543 | 26.292538 | 10.869485 | C  | 18.245491         | 19.618602 | 2.463486  |
| C  | 12.239559 | 27.244527 | 9.359972  | O  | 18.975534         | 19.094914 | 3.243061  |
| C  | 11.831212 | 28.589175 | 9.274778  | C  | 18.620464         | 20.920287 | 0.353033  |
| H  | 11.337022 | 29.063932 | 10.126447 | O  | 19.583325         | 21.294190 | -0.244799 |
| C  | 12.092637 | 29.316225 | 8.099396  | C  | 16.769904         | 17.039856 | 0.827890  |
| H  | 11.780236 | 30.363019 | 8.032645  | O  | 17.200421         | 16.068864 | 1.361126  |
| C  | 12.774344 | 28.709468 | 7.027335  | C  | 17.258199         | 18.239926 | -1.350110 |
| H  | 12.987921 | 29.278167 | 6.117768  | O  | 18.013416         | 18.079377 | -2.256425 |
| C  | 13.187798 | 27.369213 | 7.129990  | C  | 14.631132         | 17.758489 | -0.710299 |
| H  | 13.719629 | 26.882837 | 6.308112  | O  | 13.657637         | 17.265494 | -1.194367 |



**Coordinates of the Protein-Bound H-cluster Model  $^2[(EtS)_3Fe_4S_4(\mu-SEt)Fe_2(pdt)(\mu-CO)(CN)_2(CO)_2(OH_2)]^3-$**

|    |                   |           |           |    |           |           |           |
|----|-------------------|-----------|-----------|----|-----------|-----------|-----------|
| S  | -4.239154         | 0.730883  | -1.638912 | S  | 0.795514  | -0.478529 | 1.911187  |
| Fe | -2.556242         | 1.791292  | -0.555904 | C  | 0.636988  | -2.010142 | 2.874137  |
| Fe | -2.326609         | -0.629105 | -1.620458 | H  | 1.373371  | -2.036119 | 3.550198  |
| Fe | -3.945823         | -0.259052 | 0.465414  | H  | 0.728790  | -2.786403 | 2.250433  |
| S  | -0.632746         | 0.794923  | -1.280133 | C  | -0.690274 | -2.134987 | 3.604442  |
| S  | -2.803018         | 1.271644  | 1.691227  | H  | -1.453026 | -2.053154 | 2.962867  |
| S  | -2.436635         | -1.990788 | 0.247169  | H  | -0.844129 | -1.297635 | 4.285155  |
| Fe | -1.204708         | -0.157492 | 0.780382  | H  | -0.804094 | -3.134985 | 4.022845  |
| S  | -2.677087         | 4.017968  | -1.080656 | Fe | 2.809966  | -0.968883 | 0.495936  |
| C  | -1.011990         | 4.693721  | -0.977835 | Fe | 4.875012  | 0.324917  | -0.271192 |
| H  | -1.083576         | 5.687916  | -0.897119 | S  | 4.166857  | 0.178949  | 1.935780  |
| H  | -0.574997         | 4.322750  | -0.158479 | C  | 3.296182  | 1.703160  | 2.420072  |
| C  | -0.119409         | 4.375685  | -2.180395 | H  | 3.746883  | 2.133998  | 3.201873  |
| H  | 0.134625          | 3.408663  | -2.161604 | H  | 2.343067  | 1.507190  | 2.650648  |
| H  | 0.779311          | 4.989633  | -2.122231 | C  | 3.378705  | 2.596967  | 1.193467  |
| H  | -0.651060         | 4.556574  | -3.114605 | H  | 4.220694  | 2.397859  | 0.692083  |
| S  | -2.462136         | -2.022699 | -3.405503 | H  | 3.378976  | 3.555404  | 1.478957  |
| C  | -1.757549         | -3.529034 | -2.687977 | C  | 2.177679  | 2.335745  | 0.293133  |
| H  | -1.610631         | -3.348215 | -1.715475 | H  | 1.954090  | 3.143990  | -0.251646 |
| H  | -0.876509         | -3.681475 | -3.135950 | H  | 1.378861  | 2.063057  | 0.829258  |
| C  | -2.538529         | -4.834823 | -2.785204 | S  | 2.752907  | 0.969730  | -0.766827 |
| H  | -3.404420         | -4.864642 | -2.285758 | C  | 3.427351  | -2.297918 | 1.564933  |
| H  | -1.871062         | -5.576237 | -2.346127 | N  | 3.821752  | -3.133934 | 2.224269  |
| H  | -2.865145         | -4.995841 | -3.812600 | C  | 1.916140  | -1.976329 | -0.622632 |
| S  | -6.014781         | -0.879517 | 1.212478  | O  | 1.316564  | -2.589532 | -1.373721 |
| C  | -5.924187         | -0.457122 | 2.993956  | C  | 4.388054  | -1.621127 | -0.656440 |
| H  | -4.961401         | -0.377421 | 3.252157  | O  | 4.822871  | -2.485577 | -1.179371 |
| H  | -6.349926         | -1.195449 | 3.516824  | C  | 5.270930  | 0.227533  | -2.047863 |
| C  | -6.629074         | 0.852221  | 3.343164  | N  | 5.492496  | 0.119472  | -3.168268 |
| H  | -7.599703         | 0.817866  | 3.105524  | C  | 6.510082  | -0.118547 | 0.188815  |
| H  | -6.187267         | 1.664867  | 2.766417  | O  | 7.559554  | -0.402103 | 0.473515  |
| H  | -6.553284         | 1.010241  | 4.418956  | O  | 5.568376  | 2.754673  | 0.069890  |
|    | - merging point - |           |           | H  | 6.487429  | 2.789945  | 0.617020  |
|    |                   |           |           | H  | 5.701847  | 3.224565  | -0.882304 |





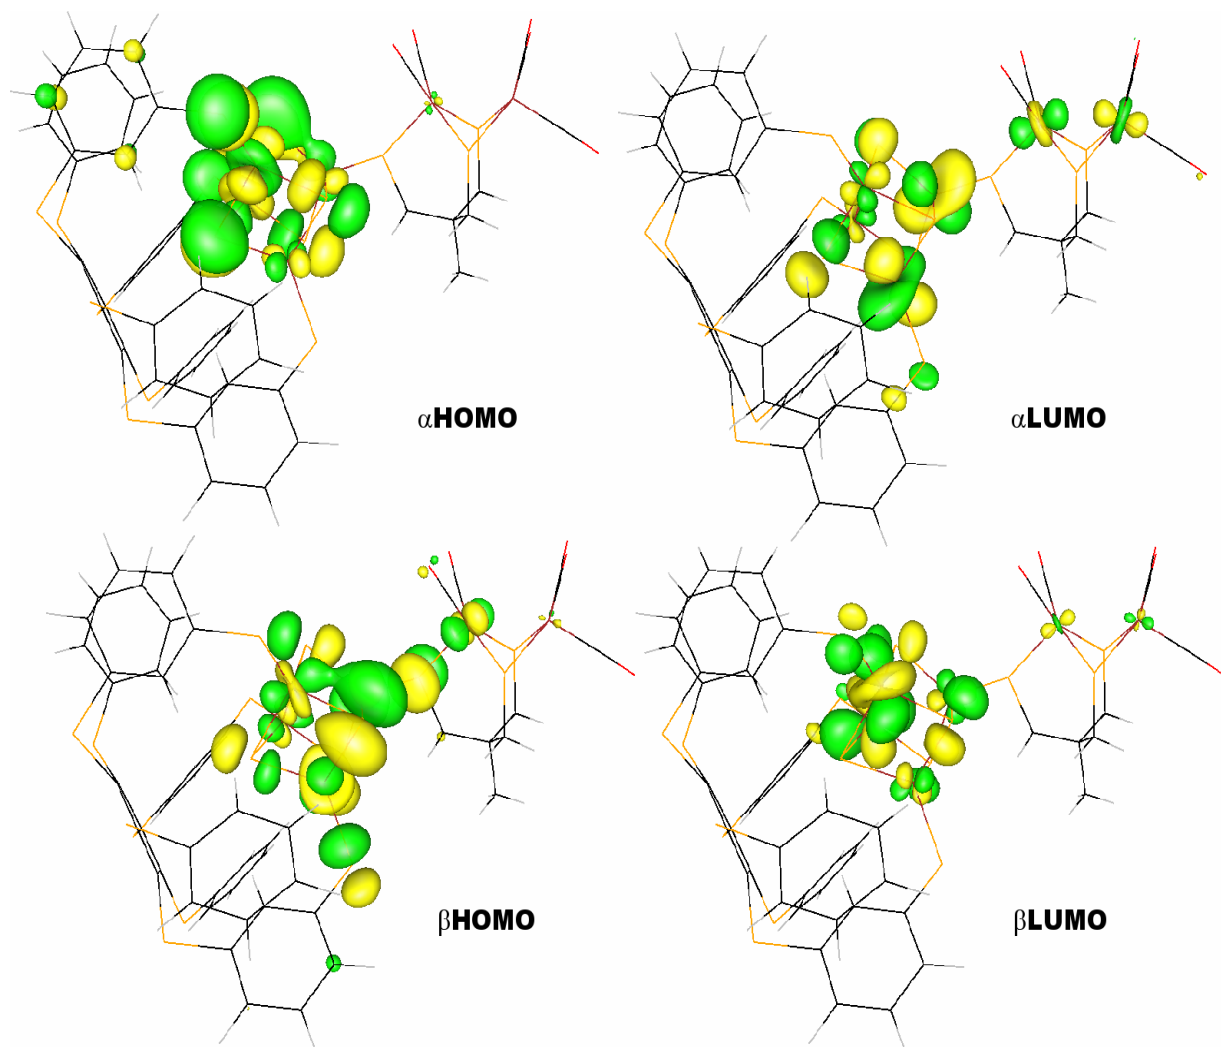

Figure S1

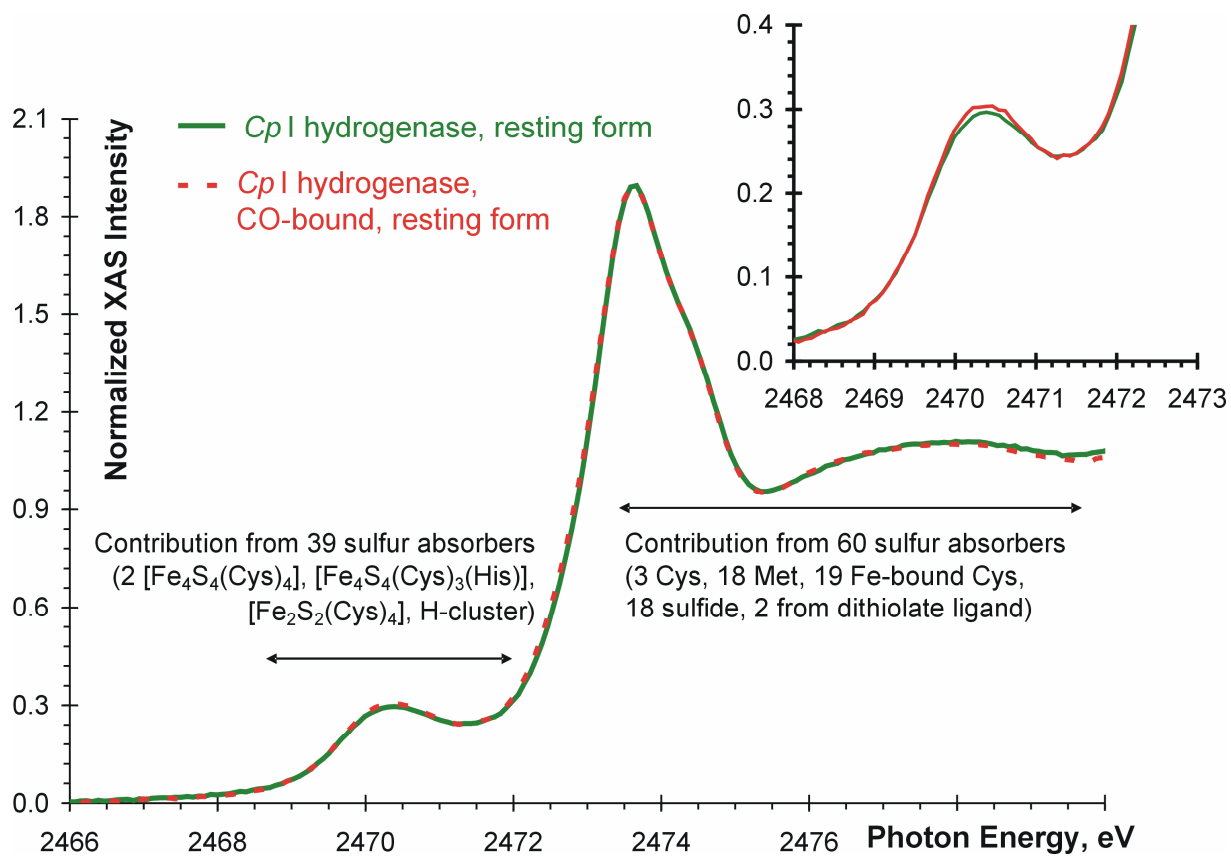

Figure S2

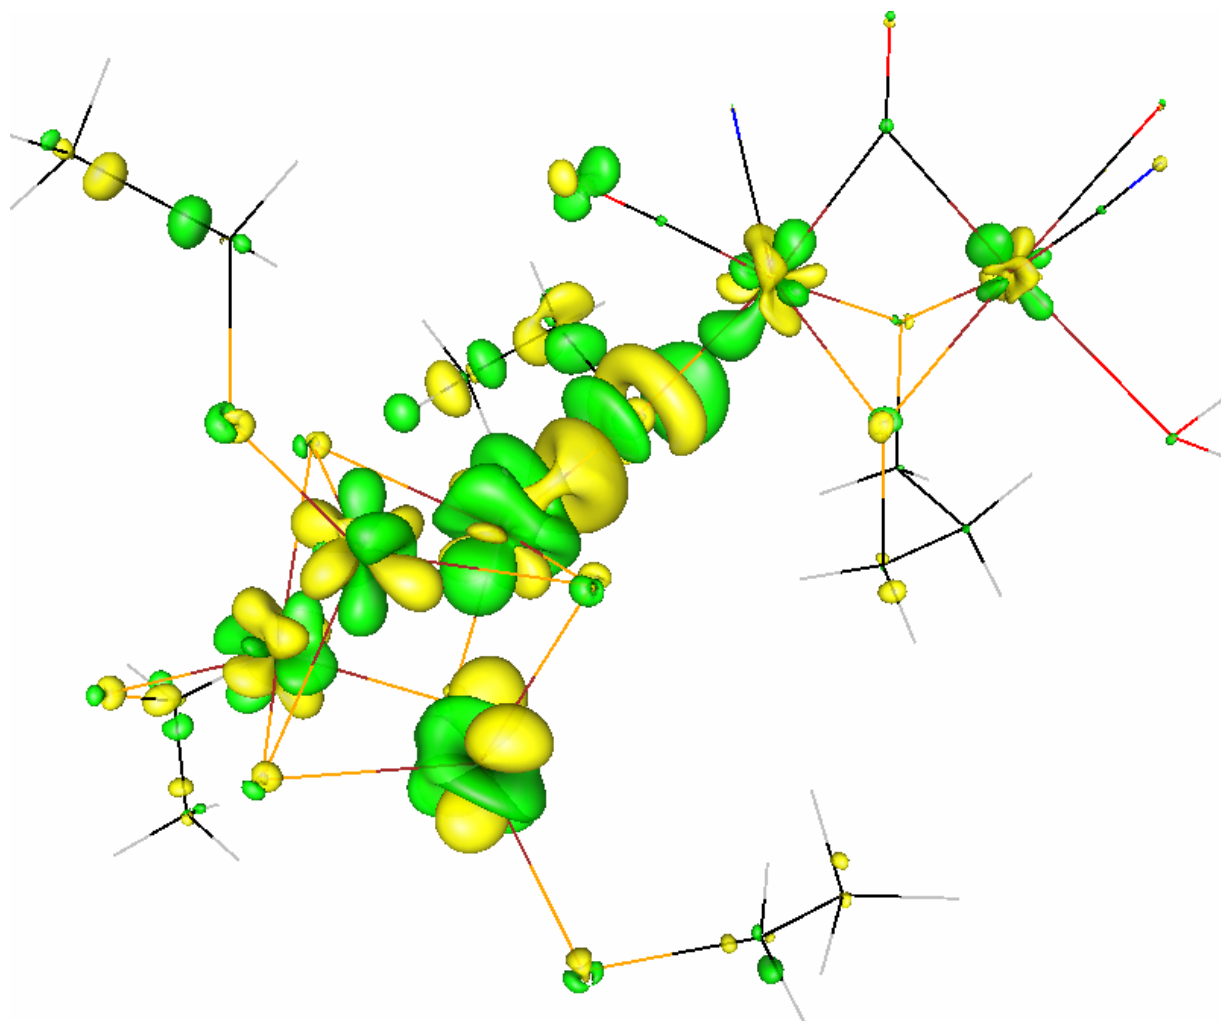

Figure S3

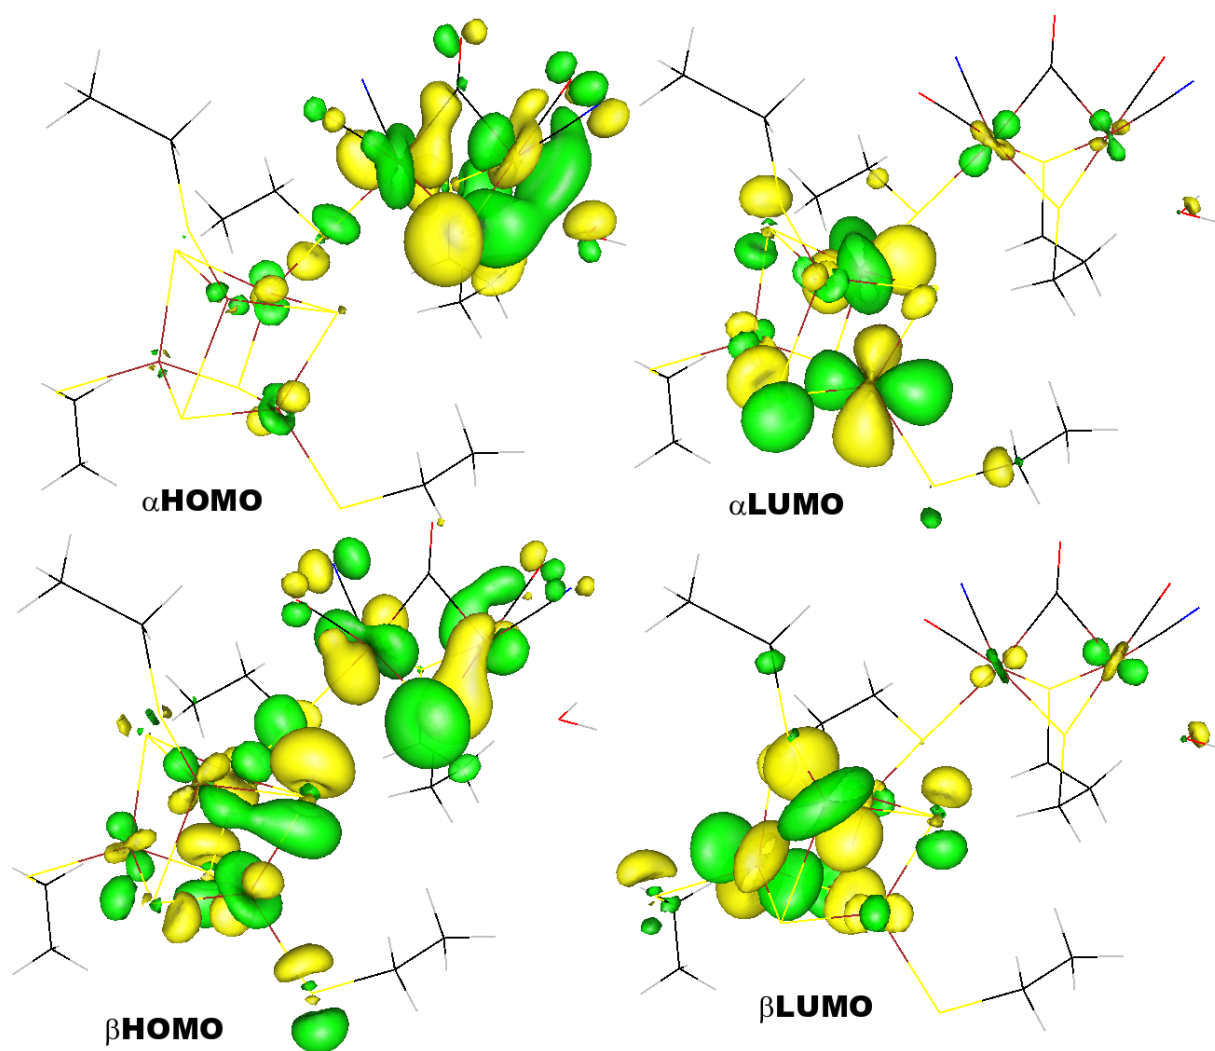

Figure S4
